# Supplementary figures and images for: Cellulose triacetate oligomers exhibit high solubility in dense CO2
Source: Royal Society of Chemistry journal article supplement (doi:10.1039/b800812d), 2008-01-01

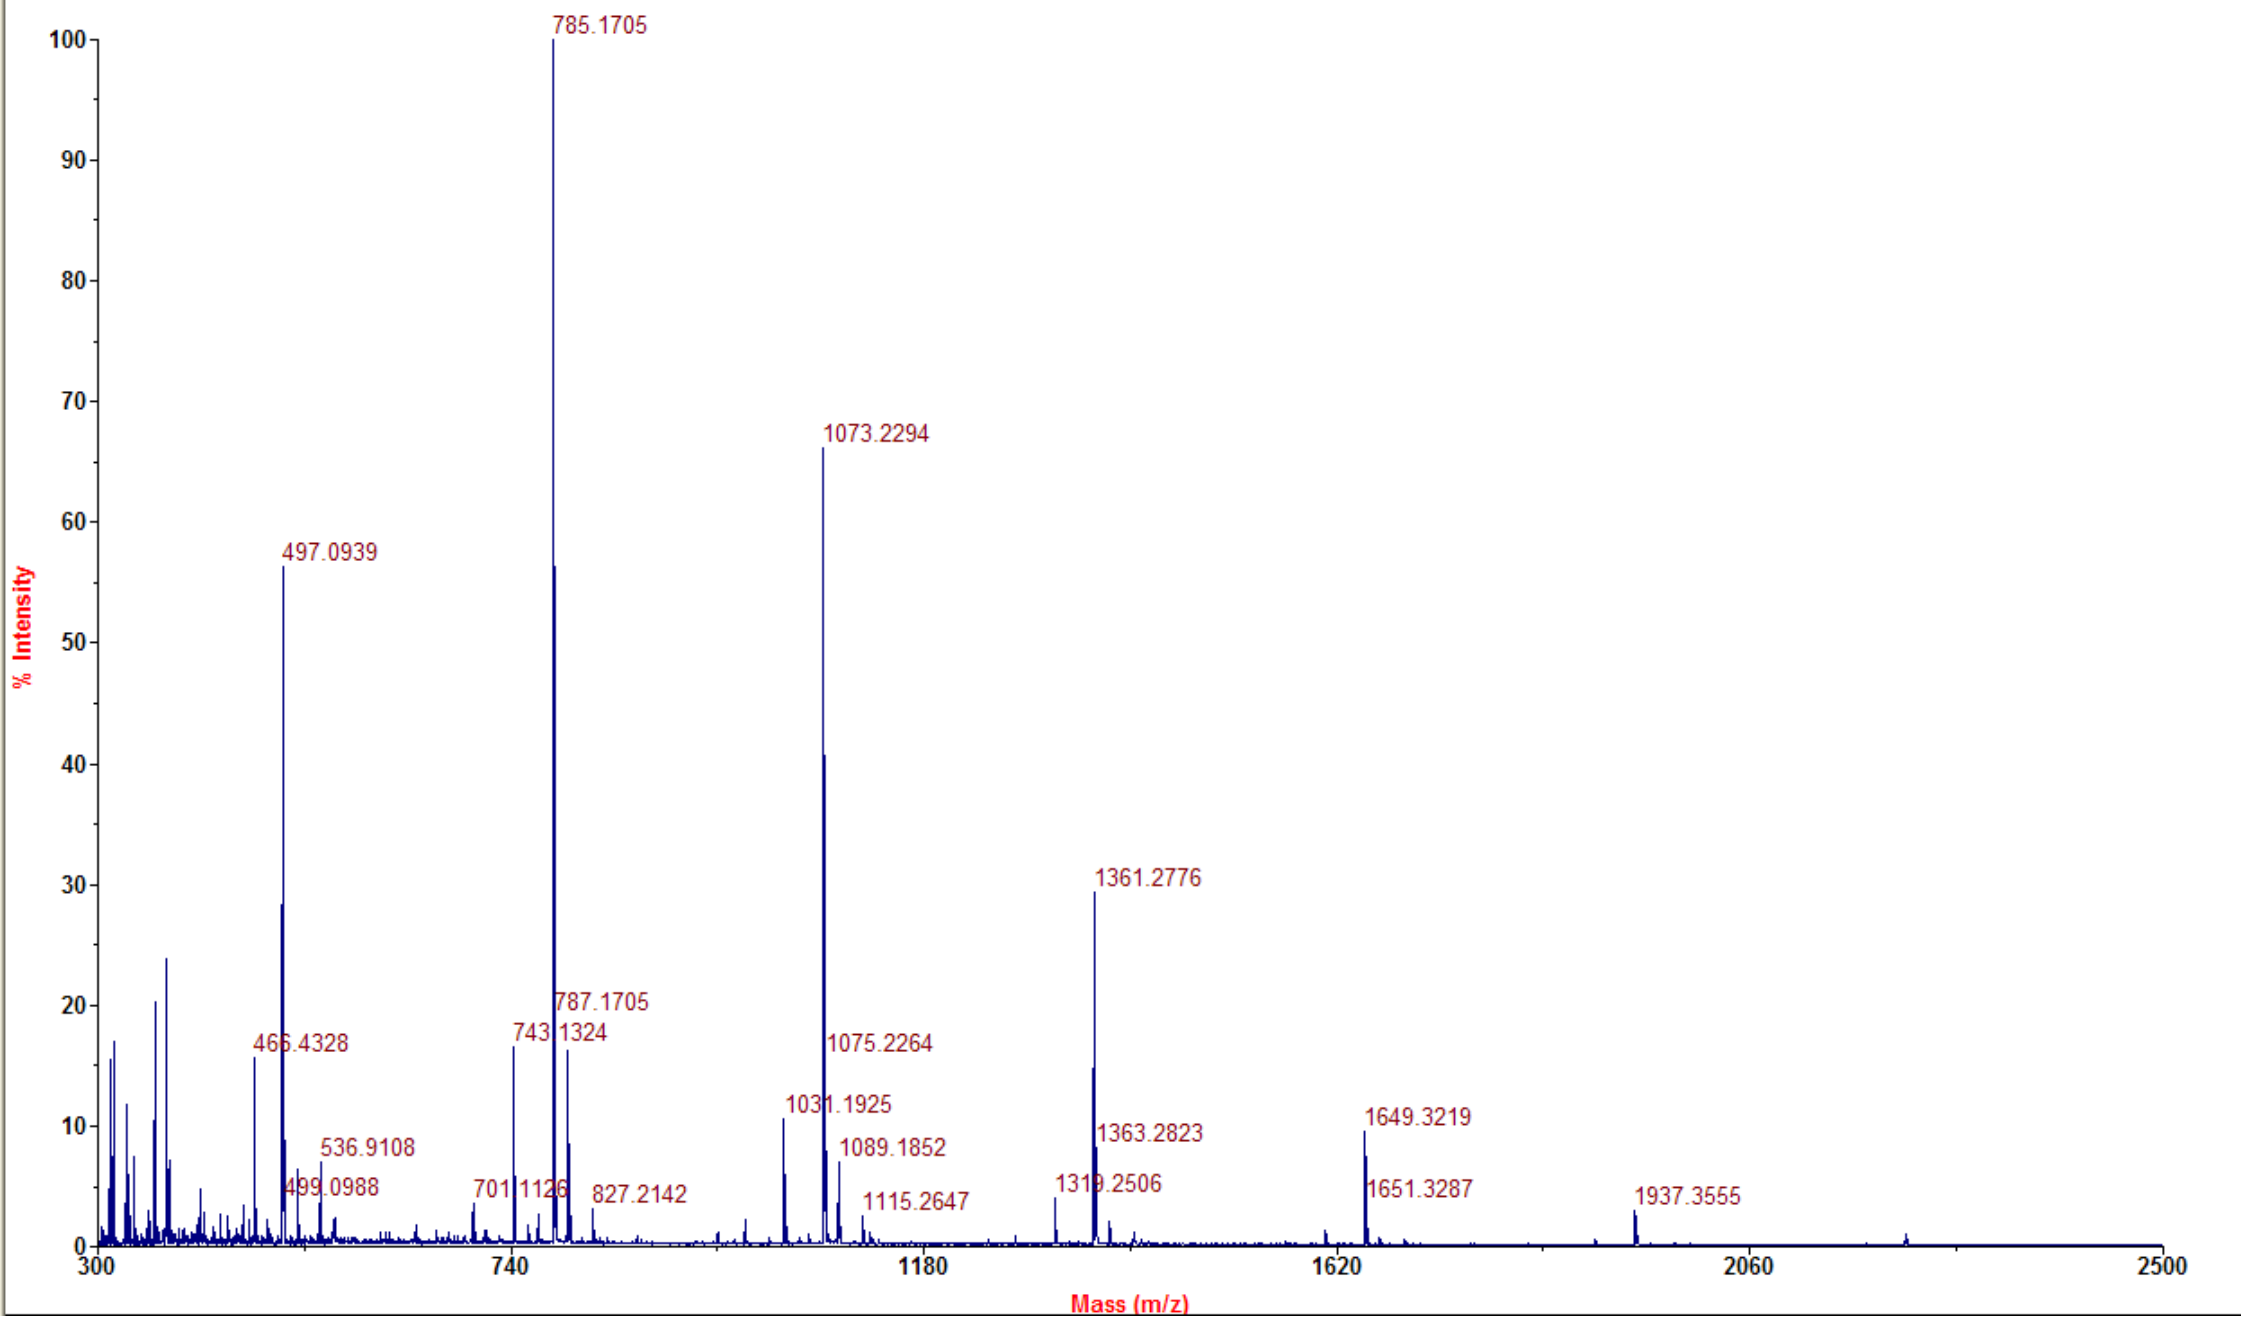

Supplement: b800812d.pdf [file b800812d.pdf]
